# Supplementary figures and images for: Physical and Visual Characteristics of the Neck Predicting Gender Perception
Source: PubMed Central journal article supplement — Plast Reconstr Surg Glob Open. 2019 Dec 30;7(12):e2573. doi: 10.1097/GOX.0000000000002573 (PMC7288875; doi:10.1097/gox.0000000000002573), 2019-12-30

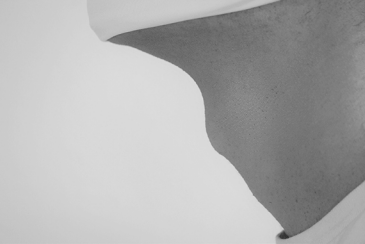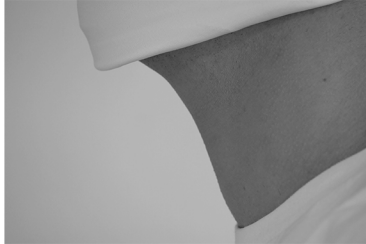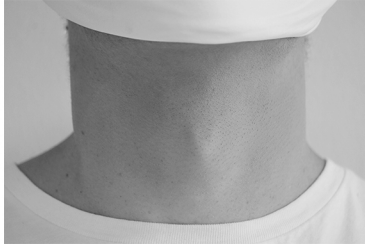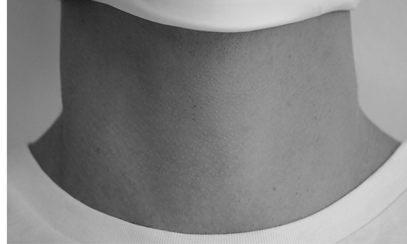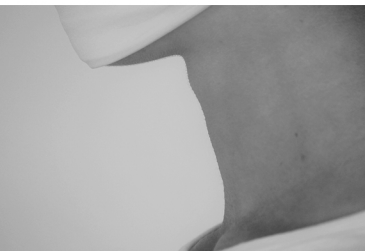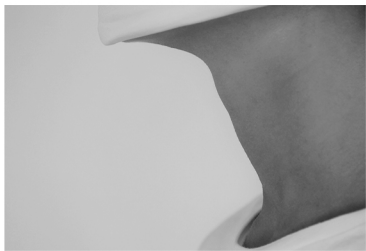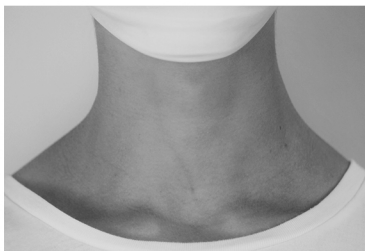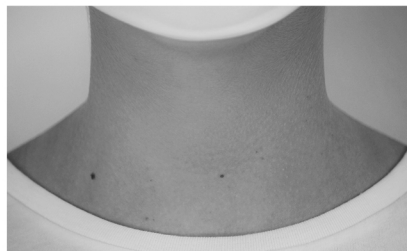

Supplement: gox-7-e2573-s001.pdf [file gox-7-e2573-s001.pdf]
